# Supplementary material
Source: Springer Nature journal article supplement (https://www.springermedizin.de/resource/supplementary/13054_2004_3472_MOESM2_ESM.pdf/9720556)
Supplement: MOESM2 [file 9720556]

|                                                 |               |
|-------------------------------------------------|---------------|
| Number of patients                              | 20            |
| Mean age, years (range)                         | 70 (49-88)    |
| Males/females                                   | 5/15          |
| Mean PaO <sub>2</sub> /FiO <sub>2</sub> (range) | 220 (118-385) |
| Mean APACHE II (range)                          | 19.8 (8-36)   |
| Mean ventilator days (range)                    | 12.3 (3-56)   |
